# Supplementary material
Source: MDPI journal article supplement (https://www.mdpi.com/2075-163X/8/5/192)
Supplement: s1 [file s1]

 
data_shelx
 
_audit_creation_method            SHELXL-97
_chemical_name_systematic
;
 ?
;
_chemical_name_common             'oyonite'
_chemical_melting_point           ?
_chemical_formula_moiety          
 'Ag5.01 As8.15 Cu0.78 Mn3.46 Pb7.66 S48 Sb14.94' 
_chemical_formula_sum
 'Ag5.01 As8.15 Cu0.78 Mn3.46 Pb7.66 S48 Sb14.94' 
_chemical_formula_weight          6335.12
 
loop_
 _atom_type_symbol
 _atom_type_description
 _atom_type_scat_dispersion_real
 _atom_type_scat_dispersion_imag
 _atom_type_scat_source
 'Ag'  'Ag'  -0.8971   1.1015
 'International Tables Vol C Tables 4.2.6.8 and 6.1.1.4'
 'As'  'As'   0.0499   2.0058
 'International Tables Vol C Tables 4.2.6.8 and 6.1.1.4'
 'Mn'  'Mn'   0.3368   0.7283
 'International Tables Vol C Tables 4.2.6.8 and 6.1.1.4'
 'Pb'  'Pb'  -3.3944  10.1111
 'International Tables Vol C Tables 4.2.6.8 and 6.1.1.4'
 'S'  'S'   0.1246   0.1234
 'International Tables Vol C Tables 4.2.6.8 and 6.1.1.4'
 'Sb'  'Sb'  -0.5866   1.5461
 'International Tables Vol C Tables 4.2.6.8 and 6.1.1.4'
 'Cu'  'Cu'   0.3201   1.2651
 'International Tables Vol C Tables 4.2.6.8 and 6.1.1.4'
 
_symmetry_cell_setting            'monoclinic'
_symmetry_space_group_name_H-M    'P 21/n'
 
loop_
 _symmetry_equiv_pos_as_xyz
 'x, y, z'
 '-x+1/2, y+1/2, -z+1/2'
 '-x, -y, -z'
 'x-1/2, -y-1/2, z-1/2'
 
_cell_length_a                    19.1806(18)
_cell_length_b                    12.7755(14)
_cell_length_c                    8.1789(10)
_cell_angle_alpha                 90.00
_cell_angle_beta                  90.471(11)
_cell_angle_gamma                 90.00
_cell_volume                      2004.1(4)
_cell_formula_units_Z             1
_cell_measurement_temperature     293(2)
_cell_measurement_reflns_used     589
_cell_measurement_theta_min       7.6
_cell_measurement_theta_max       13.2
 
_exptl_crystal_description        block
_exptl_crystal_colour             black
_exptl_crystal_size_max           0.070
_exptl_crystal_size_mid           0.055
_exptl_crystal_size_min           0.045
_exptl_crystal_density_meas       ?
_exptl_crystal_density_diffrn     5.249
_exptl_crystal_density_method     'not measured'
_exptl_crystal_F_000              2771.3
_exptl_absorpt_coefficient_mu     27.472
_exptl_absorpt_correction_type    'multi-scan'
_exptl_absorpt_correction_T_min   0.658
_exptl_absorpt_correction_T_max   0.747
_exptl_absorpt_process_details    
'(<i>ABSPACK</i>; Oxford Diffraction, 2006)'
 
_exptl_special_details
;
 ?
;
 
_diffrn_ambient_temperature       293(2)
_diffrn_radiation_wavelength      0.71073
_diffrn_radiation_type            MoK\a
_diffrn_radiation_source          'fine-focus sealed tube'
_diffrn_radiation_monochromator   graphite
_diffrn_measurement_device_type   'Oxford Xcalibur 3'
_diffrn_measurement_method        '\w scans'
_diffrn_detector_area_resol_mean  ?
_diffrn_standards_number          ?
_diffrn_standards_interval_count  .
_diffrn_standards_interval_time   .
_diffrn_standards_decay_%         ?
_diffrn_reflns_number             27568
_diffrn_reflns_av_R_equivalents   0.0501
_diffrn_reflns_av_sigmaI/netI     0.0616
_diffrn_reflns_limit_h_min        -27
_diffrn_reflns_limit_h_max        28
_diffrn_reflns_limit_k_min        0
_diffrn_reflns_limit_k_max        18
_diffrn_reflns_limit_l_min        0
_diffrn_reflns_limit_l_max        12
_diffrn_reflns_theta_min          4.19
_diffrn_reflns_theta_max          32.32
_reflns_number_total              6272
_reflns_number_gt                 2199
_reflns_threshold_expression      >2sigma(I)
 
_computing_data_collection        '<i>CrysAlis</i> (Oxford Diffraction, 2006)'
_computing_cell_refinement        '<i>CrysAlis</i> (Oxford Diffraction, 2006)'
_computing_data_reduction         '<i>CrysAlis</i> (Oxford Diffraction, 2006)'
_computing_structure_solution     'SHELXS-97 (Sheldrick, 2008)'
_computing_structure_refinement   'SHELXL-97 (Sheldrick, 2008)'
_computing_molecular_graphics     'DIAMOND (Brandenburg, 2001)'
_computing_publication_material   'SHELXL-97 (Sheldrick, 2008)'
 
_refine_special_details
;
 Refinement of F^2^ against ALL reflections.  The weighted R-factor wR and
 goodness of fit S are based on F^2^, conventional R-factors R are based
 on F, with F set to zero for negative F^2^. The threshold expression of
 F^2^ > 2sigma(F^2^) is used only for calculating R-factors(gt) etc. and is
 not relevant to the choice of reflections for refinement.  R-factors based
 on F^2^ are statistically about twice as large as those based on F, and R-
 factors based on ALL data will be even larger.
;
 
_refine_ls_structure_factor_coef  Fsqd
_refine_ls_matrix_type            full
_refine_ls_weighting_scheme       calc
_refine_ls_weighting_details
 'calc w=1/[\s^2^(Fo^2^)+(0.0169P)^2^+0.0000P] where P=(Fo^2^+2Fc^2^)/3'
_atom_sites_solution_primary      direct
_atom_sites_solution_secondary    difmap
_atom_sites_solution_hydrogens    .
_refine_ls_hydrogen_treatment     .
_refine_ls_extinction_method      none
_refine_ls_extinction_coef        ?
_refine_ls_number_reflns          6272
_refine_ls_number_parameters      206
_refine_ls_number_restraints      0
_refine_ls_R_factor_all           0.0317
_refine_ls_R_factor_gt            0.0227
_refine_ls_wR_factor_ref          0.0756
_refine_ls_wR_factor_gt           0.0742
_refine_ls_goodness_of_fit_ref    0.943
_refine_ls_restrained_S_all       0.943
_refine_ls_shift/su_max           0.001
_refine_ls_shift/su_mean          0.000
 
loop_
 _atom_site_label
 _atom_site_type_symbol
 _atom_site_fract_x
 _atom_site_fract_y
 _atom_site_fract_z
 _atom_site_U_iso_or_equiv
 _atom_site_adp_type
 _atom_site_occupancy
 _atom_site_symmetry_multiplicity
 _atom_site_calc_flag
 _atom_site_refinement_flags
 _atom_site_disorder_assembly
 _atom_site_disorder_group
M1SB Sb 0.13588(7) 0.33007(10) 0.1226(2) 0.0516(6) Uani 0.686(7) 1 d P . .
M1MN Mn 0.13588(7) 0.33007(10) 0.1226(2) 0.0516(6) Uani 0.314(7) 1 d P . .
M2AS As 0.06326(7) 0.62044(10) 0.1240(2) 0.0285(4) Uani 0.962(8) 1 d P . .
M2SB Sb 0.06326(7) 0.62044(10) 0.1240(2) 0.0285(4) Uani 0.038(8) 1 d P . .
M3PB Pb 0.24633(3) 0.58190(5) 0.38468(9) 0.0473(3) Uani 0.914(7) 1 d P . .
M3SB Sb 0.24633(3) 0.58190(5) 0.38468(9) 0.0473(3) Uani 0.086(7) 1 d P . .
M4AG Ag 0.35946(6) 0.32999(10) 0.1290(2) 0.0526(6) Uani 0.804(11) 1 d P . .
M4CU Cu 0.35946(6) 0.32999(10) 0.1290(2) 0.0526(6) Uani 0.196(11) 1 d P . .
M5SB Sb 0.45771(5) 0.60464(7) 0.12818(14) 0.0335(2) Uani 1 1 d . . .
M6SB Sb 0.11431(5) 0.33212(7) 0.61891(15) 0.0379(3) Uani 1 1 d . . .
M7SB Sb 0.05163(5) 0.63732(7) 0.64699(16) 0.0378(4) Uani 0.924(9) 1 d P . .
M7AS As 0.05163(5) 0.63732(7) 0.64699(16) 0.0378(4) Uani 0.076(9) 1 d P . .
M8PB Pb 0.24437(3) 0.57781(4) 0.88178(9) 0.03755(17) Uani 1 1 d . . .
M9MN Mn 0.36399(6) 0.34426(9) 0.61981(19) 0.0206(4) Uani 0.551(7) 1 d P . .
M9AG Ag 0.36399(6) 0.34426(9) 0.61981(19) 0.0206(4) Uani 0.449(7) 1 d P . .
M10 As 0.43438(6) 0.59947(10) 0.6332(2) 0.0254(3) Uani 1 1 d . . .
S1 S 0.10162(18) 0.5079(3) 0.3380(5) 0.0386(10) Uani 1 1 d . . .
S2 S -0.00526(16) 0.2328(2) 0.1480(5) 0.0307(8) Uani 1 1 d . . .
S3 S 0.25202(18) 0.4302(2) 0.1410(5) 0.0361(9) Uani 1 1 d . . .
S4 S 0.16551(16) 0.7182(2) 0.1134(5) 0.0294(8) Uani 1 1 d . . .
S5 S 0.3869(2) 0.4999(3) 0.4219(6) 0.0472(12) Uani 1 1 d . . .
S6 S 0.34676(15) 0.7112(2) 0.1079(5) 0.0304(8) Uani 1 1 d . . .
S7 S 0.09079(17) 0.5105(3) 0.8999(6) 0.0447(12) Uani 1 1 d . . .
S8 S 0.4878(2) 0.2893(3) 0.0895(4) 0.0411(10) Uani 1 1 d . . .
S9 S 0.23511(15) 0.4184(3) 0.6087(5) 0.0327(9) Uani 1 1 d . . .
S10 S 0.16473(15) 0.7198(2) 0.6452(6) 0.0324(9) Uani 1 1 d . . .
S11 S 0.39483(18) 0.4895(2) 0.8337(5) 0.0396(11) Uani 1 1 d . . .
S12 S 0.34338(15) 0.7228(2) 0.6460(5) 0.0283(8) Uani 1 1 d . . .
 
loop_
 _atom_site_aniso_label
 _atom_site_aniso_U_11
 _atom_site_aniso_U_22
 _atom_site_aniso_U_33
 _atom_site_aniso_U_23
 _atom_site_aniso_U_13
 _atom_site_aniso_U_12
M1SB 0.0759(10) 0.0459(9) 0.0330(9) -0.0077(9) 0.0024(8) -0.0111(6)
M1MN 0.0759(10) 0.0459(9) 0.0330(9) -0.0077(9) 0.0024(8) -0.0111(6)
M2AS 0.0430(8) 0.0255(7) 0.0169(8) 0.0015(8) 0.0046(8) -0.0003(5)
M2SB 0.0430(8) 0.0255(7) 0.0169(8) 0.0015(8) 0.0046(8) -0.0003(5)
M3PB 0.0575(4) 0.0536(4) 0.0309(4) 0.0005(4) 0.0023(4) 0.0152(3)
M3SB 0.0575(4) 0.0536(4) 0.0309(4) 0.0005(4) 0.0023(4) 0.0152(3)
M4AG 0.0555(8) 0.0673(10) 0.0352(9) 0.0147(10) 0.0166(8) 0.0248(7)
M4CU 0.0555(8) 0.0673(10) 0.0352(9) 0.0147(10) 0.0166(8) 0.0248(7)
M5SB 0.0397(5) 0.0336(5) 0.0272(6) -0.0045(6) -0.0013(5) -0.0034(4)
M6SB 0.0481(5) 0.0334(5) 0.0323(6) 0.0072(6) 0.0077(6) 0.0035(4)
M7SB 0.0340(6) 0.0383(6) 0.0412(8) 0.0011(6) 0.0001(5) 0.0005(4)
M7AS 0.0340(6) 0.0383(6) 0.0412(8) 0.0011(6) 0.0001(5) 0.0005(4)
M8PB 0.0411(3) 0.0359(3) 0.0357(4) 0.0005(3) 0.0023(3) 0.0001(2)
M9MN 0.0315(7) 0.0190(6) 0.0111(7) -0.0008(7) -0.0069(7) -0.0045(5)
M9AG 0.0315(7) 0.0190(6) 0.0111(7) -0.0008(7) -0.0069(7) -0.0045(5)
M10 0.0312(6) 0.0268(6) 0.0185(8) 0.0046(8) 0.0027(7) 0.0038(5)
S1 0.0370(19) 0.0382(19) 0.041(3) 0.035(2) -0.0051(18) -0.0033(15)
S2 0.0277(16) 0.0331(17) 0.031(2) 0.0126(19) 0.0009(18) 0.0109(13)
S3 0.0500(19) 0.0321(17) 0.026(2) 0.0123(19) 0.007(2) 0.0143(16)
S4 0.0425(19) 0.0175(15) 0.028(2) -0.0137(19) -0.0111(19) -0.0076(13)
S5 0.058(2) 0.0278(18) 0.055(3) 0.014(2) -0.010(2) -0.0072(19)
S6 0.0225(15) 0.0358(17) 0.033(2) -0.005(2) -0.0033(17) 0.0078(14)
S7 0.0310(18) 0.044(2) 0.059(3) -0.004(3) 0.001(2) -0.0092(16)
S8 0.061(2) 0.043(2) 0.019(2) 0.0069(18) -0.0020(19) -0.0073(18)
S9 0.0241(14) 0.0334(17) 0.041(2) -0.024(2) 0.0041(18) -0.0035(13)
S10 0.0255(16) 0.0300(18) 0.042(3) 0.026(2) 0.0096(17) 0.0082(13)
S11 0.0396(19) 0.0204(16) 0.059(3) 0.030(2) 0.002(2) -0.0043(15)
S12 0.0259(15) 0.0313(15) 0.028(2) -0.0241(18) 0.0072(17) -0.0025(13)
 
_geom_special_details
;
 All esds (except the esd in the dihedral angle between two l.s. planes)
 are estimated using the full covariance matrix.  The cell esds are taken
 into account individually in the estimation of esds in distances, angles
 and torsion angles; correlations between esds in cell parameters are only
 used when they are defined by crystal symmetry.  An approximate (isotropic)
 treatment of cell esds is used for estimating esds involving l.s. planes.
;
 
loop_
 _geom_bond_atom_site_label_1
 _geom_bond_atom_site_label_2
 _geom_bond_distance
 _geom_bond_site_symmetry_2
 _geom_bond_publ_flag
M1SB S3 2.572(4) . ?
M1SB S12 2.622(4) 2_545 ?
M1SB S6 2.695(4) 2_545 ?
M1SB S1 2.953(5) . ?
M1SB S2 2.987(4) . ?
M1SB S7 3.059(5) 1_554 ?
M1SB M10 3.8504(19) 2_545 ?
M1SB M3SB 3.8938(15) 2_545 ?
M1SB M3PB 3.8938(15) 2_545 ?
M1SB M2AS 3.9627(19) . ?
M1SB M5SB 3.9665(17) 2_545 ?
M2AS S4 2.327(3) . ?
M2AS S7 2.372(5) 1_554 ?
M2AS S1 2.377(4) . ?
M2AS S2 3.108(4) 3_565 ?
M2AS S8 3.338(4) 2 ?
M2AS S7 3.400(3) 3_566 ?
M2AS M4CU 3.660(2) 2 ?
M2AS M4AG 3.660(2) 2 ?
M2AS M9AG 3.7610(19) 2 ?
M2AS M9MN 3.7610(19) 2 ?
M2AS M7AS 3.912(2) 1_554 ?
M2AS M7SB 3.912(2) 1_554 ?
M3PB S3 2.782(4) . ?
M3PB S9 2.788(4) . ?
M3PB S5 2.906(4) . ?
M3PB S1 2.954(3) . ?
M3PB S10 3.186(4) . ?
M3PB S4 3.210(4) . ?
M3PB S12 3.348(3) . ?
M3PB S6 3.411(4) . ?
M3PB M4CU 3.7646(15) 2 ?
M3PB M4AG 3.7646(15) 2 ?
M3PB M1MN 3.8938(15) 2 ?
M3PB M1SB 3.8938(15) 2 ?
M4AG S3 2.429(3) . ?
M4AG S8 2.540(4) . ?
M4AG S4 2.593(4) 2_545 ?
M4AG S10 2.685(4) 2_545 ?
M4AG S11 3.236(4) 1_554 ?
M4AG S5 3.272(5) . ?
M4AG M2SB 3.660(2) 2_545 ?
M4AG M2AS 3.660(2) 2_545 ?
M4AG M7AS 3.7584(18) 2_545 ?
M4AG M7SB 3.7584(18) 2_545 ?
M4AG M3SB 3.7646(15) 2_545 ?
M4AG M3PB 3.7646(15) 2_545 ?
M5SB S8 2.476(4) 3_665 ?
M5SB S6 2.531(3) . ?
M5SB S2 2.615(3) 2 ?
M5SB S11 3.061(4) 1_554 ?
M5SB S5 3.076(5) . ?
M5SB S11 3.087(3) 3_666 ?
M5SB M7AS 3.7593(13) 4_675 ?
M5SB M7SB 3.7593(13) 4_675 ?
M5SB M5SB 3.772(2) 3_665 ?
M5SB M6SB 3.7938(14) 2 ?
M5SB M10 3.8503(16) 3_666 ?
M5SB M1MN 3.9665(18) 2 ?
M6SB S12 2.506(4) 2_546 ?
M6SB S6 2.531(4) 2_545 ?
M6SB S9 2.568(3) . ?
M6SB S8 2.888(4) 4_566 ?
M6SB S1 3.221(4) . ?
M6SB S7 3.270(4) . ?
M6SB M10 3.7211(17) 2_546 ?
M6SB M5SB 3.7938(14) 2_545 ?
M6SB M7AS 3.8600(15) 3_566 ?
M6SB M7SB 3.8600(15) 3_566 ?
M6SB M2SB 4.0630(18) 3_566 ?
M6SB M2AS 4.0630(18) 3_566 ?
M7SB S10 2.412(3) . ?
M7SB S2 2.525(4) 3_566 ?
M7SB S7 2.728(5) . ?
M7SB S8 2.839(4) 2 ?
M7SB S1 3.175(5) . ?
M7SB S1 3.479(3) 3_566 ?
M7SB M9AG 3.6326(17) 2_556 ?
M7SB M9MN 3.6326(17) 2_556 ?
M7SB M4CU 3.7584(18) 2 ?
M7SB M4AG 3.7584(18) 2 ?
M7SB M5SB 3.7593(13) 4_576 ?
M7SB M6SB 3.8600(15) 3_566 ?
M8PB S3 2.840(3) 1_556 ?
M8PB S4 3.023(4) 1_556 ?
M8PB S9 3.027(4) . ?
M8PB S10 3.053(4) . ?
M8PB S7 3.073(3) . ?
M8PB S11 3.126(4) . ?
M8PB S6 3.182(4) 1_556 ?
M8PB S12 3.289(4) . ?
M8PB M9AG 3.9884(12) 2_556 ?
M8PB M9MN 3.9884(12) 2_556 ?
M8PB M2SB 4.0498(16) 1_556 ?
M8PB M2AS 4.0498(16) 1_556 ?
M9MN S4 2.556(4) 2_545 ?
M9MN S10 2.558(4) 2_546 ?
M9MN S5 2.604(4) . ?
M9MN S11 2.615(4) . ?
M9MN S9 2.648(3) . ?
M9MN S2 2.702(3) 4_666 ?
M9MN M10 3.5302(17) . ?
M9MN M7AS 3.6326(17) 2_546 ?
M9MN M7SB 3.6326(17) 2_546 ?
M9MN M2SB 3.7610(19) 2_545 ?
M9MN M2AS 3.7610(19) 2_545 ?
M9MN M8PB 3.9884(12) 2_546 ?
M10 S11 2.293(4) . ?
M10 S5 2.326(5) . ?
M10 S12 2.355(3) . ?
M10 S8 3.055(4) 3_666 ?
M10 S2 3.177(4) 2 ?
M10 S5 3.687(4) 3_666 ?
M10 M6SB 3.7211(17) 2_556 ?
M10 M5SB 3.8503(16) 3_666 ?
M10 M1MN 3.8504(19) 2 ?
M10 M1SB 3.8504(19) 2 ?
S1 M7AS 3.479(3) 3_566 ?
S1 M7SB 3.479(3) 3_566 ?
S1 M4AG 4.190(4) 2 ?
S2 M7AS 2.525(4) 3_566 ?
S2 M7SB 2.525(4) 3_566 ?
S2 M5SB 2.615(3) 2_545 ?
S2 M9AG 2.702(3) 4_565 ?
S2 M9MN 2.702(3) 4_565 ?
S2 M2AS 3.108(4) 3_565 ?
S2 M2SB 3.108(4) 3_565 ?
S2 M10 3.177(4) 2_545 ?
S2 M10 4.402(4) 4_565 ?
S3 M8PB 2.840(3) 1_554 ?
S3 M3SB 4.455(3) 2_545 ?
S3 M3PB 4.455(3) 2_545 ?
S4 M9AG 2.556(4) 2 ?
S4 M9MN 2.556(4) 2 ?
S4 M4CU 2.593(4) 2 ?
S4 M4AG 2.593(4) 2 ?
S4 M8PB 3.023(4) 1_554 ?
S4 M7AS 4.500(4) 1_554 ?
S4 M7SB 4.500(4) 1_554 ?
S4 M1MN 4.592(3) 2 ?
S5 M10 3.687(4) 3_666 ?
S5 M1MN 4.256(4) 2 ?
S5 M1SB 4.256(4) 2 ?
S5 M5SB 4.902(4) 3_666 ?
S6 M6SB 2.531(4) 2 ?
S6 M1MN 2.695(4) 2 ?
S6 M1SB 2.695(4) 2 ?
S6 M8PB 3.182(4) 1_554 ?
S6 M7AS 4.389(3) 4_675 ?
S6 M7SB 4.389(3) 4_675 ?
S6 M10 4.477(4) 1_554 ?
S6 M9AG 4.751(3) 2 ?
S6 M9MN 4.751(3) 2 ?
S7 M2SB 2.372(5) 1_556 ?
S7 M2AS 2.372(5) 1_556 ?
S7 M1MN 3.059(5) 1_556 ?
S7 M1SB 3.059(5) 1_556 ?
S7 M2SB 3.400(3) 3_566 ?
S7 M2AS 3.400(3) 3_566 ?
S7 M9AG 4.354(4) 2_556 ?
S7 M9MN 4.354(4) 2_556 ?
S8 M5SB 2.476(4) 3_665 ?
S8 M7AS 2.839(4) 2_545 ?
S8 M7SB 2.839(4) 2_545 ?
S8 M6SB 2.888(4) 4_665 ?
S8 M10 3.055(4) 3_666 ?
S8 M2SB 3.338(4) 2_545 ?
S8 M2AS 3.338(4) 2_545 ?
S8 M9AG 4.555(4) 1_554 ?
S8 M9MN 4.555(4) 1_554 ?
S9 M8PB 4.369(3) 2_546 ?
S10 M9AG 2.558(4) 2_556 ?
S10 M9MN 2.558(4) 2_556 ?
S10 M4CU 2.685(4) 2 ?
S10 M4AG 2.685(4) 2 ?
S10 M5SB 4.561(3) 4_576 ?
S10 M2SB 4.567(4) 1_556 ?
S10 M2AS 4.567(4) 1_556 ?
S11 M5SB 3.061(4) 1_556 ?
S11 M5SB 3.087(3) 3_666 ?
S11 M4AG 3.236(4) 1_556 ?
S11 M6SB 4.398(3) 2_556 ?
S11 M7AS 4.618(3) 2_546 ?
S11 M7SB 4.618(3) 2_546 ?
S12 M6SB 2.506(4) 2_556 ?
S12 M1MN 2.622(4) 2 ?
S12 M1SB 2.622(4) 2 ?
S12 M2SB 4.673(3) 4_676 ?
S12 M2AS 4.673(3) 4_676 ?
S12 M4AG 4.683(4) 2 ?
S12 M9AG 4.693(3) 2_556 ?
S12 M9MN 4.693(3) 2_556 ?
 
loop_
 _geom_angle_atom_site_label_1
 _geom_angle_atom_site_label_2
 _geom_angle_atom_site_label_3
 _geom_angle
 _geom_angle_site_symmetry_1
 _geom_angle_site_symmetry_3
 _geom_angle_publ_flag
S3 M1SB S12 99.89(12) . 2_545 ?
S3 M1SB S6 97.54(11) . 2_545 ?
S12 M1SB S6 111.87(11) 2_545 2_545 ?
S3 M1SB S1 77.23(11) . . ?
S12 M1SB S1 159.71(11) 2_545 . ?
S6 M1SB S1 88.40(11) 2_545 . ?
S3 M1SB S2 170.96(13) . . ?
S12 M1SB S2 89.14(10) 2_545 . ?
S6 M1SB S2 79.32(10) 2_545 . ?
S1 M1SB S2 94.14(10) . . ?
S3 M1SB S7 84.28(11) . 1_554 ?
S12 M1SB S7 86.49(12) 2_545 1_554 ?
S6 M1SB S7 160.77(13) 2_545 1_554 ?
S1 M1SB S7 73.26(10) . 1_554 ?
S2 M1SB S7 95.91(9) . 1_554 ?
S3 M1SB M10 135.36(10) . 2_545 ?
S12 M1SB M10 36.86(7) 2_545 2_545 ?
S6 M1SB M10 93.08(8) 2_545 2_545 ?
S1 M1SB M10 146.55(8) . 2_545 ?
S2 M1SB M10 53.59(8) . 2_545 ?
S7 M1SB M10 99.04(9) 1_554 2_545 ?
S3 M1SB M3SB 84.48(8) . 2_545 ?
S12 M1SB M3SB 57.99(7) 2_545 2_545 ?
S6 M1SB M3SB 59.07(8) 2_545 2_545 ?
S1 M1SB M3SB 140.15(8) . 2_545 ?
S2 M1SB M3SB 100.88(7) . 2_545 ?
S7 M1SB M3SB 139.99(10) 1_554 2_545 ?
M10 M1SB M3SB 64.49(3) 2_545 2_545 ?
S3 M1SB M3PB 84.48(8) . 2_545 ?
S12 M1SB M3PB 57.99(7) 2_545 2_545 ?
S6 M1SB M3PB 59.07(8) 2_545 2_545 ?
S1 M1SB M3PB 140.15(8) . 2_545 ?
S2 M1SB M3PB 100.88(7) . 2_545 ?
S7 M1SB M3PB 139.99(10) 1_554 2_545 ?
M10 M1SB M3PB 64.49(3) 2_545 2_545 ?
M3SB M1SB M3PB 0.00(3) 2_545 2_545 ?
S3 M1SB M2AS 80.70(8) . . ?
S12 M1SB M2AS 123.17(9) 2_545 . ?
S6 M1SB M2AS 124.48(10) 2_545 . ?
S1 M1SB M2AS 36.66(7) . . ?
S2 M1SB M2AS 94.03(7) . . ?
S7 M1SB M2AS 36.72(9) 1_554 . ?
M10 M1SB M2AS 126.61(5) 2_545 . ?
M3SB M1SB M2AS 165.09(4) 2_545 . ?
M3PB M1SB M2AS 165.09(4) 2_545 . ?
S3 M1SB M5SB 136.60(10) . 2_545 ?
S12 M1SB M5SB 97.11(8) 2_545 2_545 ?
S6 M1SB M5SB 39.10(7) 2_545 2_545 ?
S1 M1SB M5SB 98.53(8) . 2_545 ?
S2 M1SB M5SB 41.24(7) . 2_545 ?
S7 M1SB M5SB 136.58(8) 1_554 2_545 ?
M10 M1SB M5SB 64.27(4) 2_545 2_545 ?
M3SB M1SB M5SB 71.44(3) 2_545 2_545 ?
M3PB M1SB M5SB 71.44(3) 2_545 2_545 ?
M2AS M1SB M5SB 121.17(5) . 2_545 ?
S4 M2AS S7 95.50(13) . 1_554 ?
S4 M2AS S1 95.51(13) . . ?
S7 M2AS S1 98.14(14) 1_554 . ?
S4 M2AS S2 86.93(12) . 3_565 ?
S7 M2AS S2 83.38(13) 1_554 3_565 ?
S1 M2AS S2 176.98(12) . 3_565 ?
S4 M2AS S8 86.08(12) . 2 ?
S7 M2AS S8 173.50(13) 1_554 2 ?
S1 M2AS S8 87.97(13) . 2 ?
S2 M2AS S8 90.42(9) 3_565 2 ?
S4 M2AS S7 173.83(14) . 3_566 ?
S7 M2AS S7 82.14(12) 1_554 3_566 ?
S1 M2AS S7 90.48(12) . 3_566 ?
S2 M2AS S7 87.14(10) 3_565 3_566 ?
S8 M2AS S7 95.64(10) 2 3_566 ?
S4 M2AS M4CU 44.80(10) . 2 ?
S7 M2AS M4CU 140.16(10) 1_554 2 ?
S1 M2AS M4CU 85.08(11) . 2 ?
S2 M2AS M4CU 95.45(8) 3_565 2 ?
S8 M2AS M4CU 42.24(7) 2 2 ?
S7 M2AS M4CU 137.68(9) 3_566 2 ?
S4 M2AS M4AG 44.80(10) . 2 ?
S7 M2AS M4AG 140.16(10) 1_554 2 ?
S1 M2AS M4AG 85.08(11) . 2 ?
S2 M2AS M4AG 95.45(8) 3_565 2 ?
S8 M2AS M4AG 42.24(7) 2 2 ?
S7 M2AS M4AG 137.68(9) 3_566 2 ?
M4CU M2AS M4AG 0.00(5) 2 2 ?
S4 M2AS M9AG 41.91(10) . 2 ?
S7 M2AS M9AG 87.40(10) 1_554 2 ?
S1 M2AS M9AG 137.40(10) . 2 ?
S2 M2AS M9AG 45.10(7) 3_565 2 ?
S8 M2AS M9AG 89.61(8) 2 2 ?
S7 M2AS M9AG 132.06(9) 3_566 2 ?
M4CU M2AS M9AG 65.56(4) 2 2 ?
M4AG M2AS M9AG 65.56(4) 2 2 ?
S4 M2AS M9MN 41.91(10) . 2 ?
S7 M2AS M9MN 87.40(10) 1_554 2 ?
S1 M2AS M9MN 137.40(10) . 2 ?
S2 M2AS M9MN 45.10(7) 3_565 2 ?
S8 M2AS M9MN 89.61(8) 2 2 ?
S7 M2AS M9MN 132.06(9) 3_566 2 ?
M4CU M2AS M9MN 65.56(4) 2 2 ?
M4AG M2AS M9MN 65.56(4) 2 2 ?
M9AG M2AS M9MN 0.00(5) 2 2 ?
S4 M2AS M7AS 88.53(12) . 1_554 ?
S7 M2AS M7AS 43.38(11) 1_554 1_554 ?
S1 M2AS M7AS 141.50(12) . 1_554 ?
S2 M2AS M7AS 40.16(7) 3_565 1_554 ?
S8 M2AS M7AS 130.53(8) 2 1_554 ?
S7 M2AS M7AS 85.85(9) 3_566 1_554 ?
M4CU M2AS M7AS 121.98(5) 2 1_554 ?
M4AG M2AS M7AS 121.98(5) 2 1_554 ?
M9AG M2AS M7AS 56.48(3) 2 1_554 ?
M9MN M2AS M7AS 56.48(3) 2 1_554 ?
S4 M2AS M7SB 88.53(12) . 1_554 ?
S7 M2AS M7SB 43.38(11) 1_554 1_554 ?
S1 M2AS M7SB 141.50(12) . 1_554 ?
S2 M2AS M7SB 40.16(7) 3_565 1_554 ?
S8 M2AS M7SB 130.53(8) 2 1_554 ?
S7 M2AS M7SB 85.85(9) 3_566 1_554 ?
M4CU M2AS M7SB 121.98(5) 2 1_554 ?
M4AG M2AS M7SB 121.98(5) 2 1_554 ?
M9AG M2AS M7SB 56.48(3) 2 1_554 ?
M9MN M2AS M7SB 56.48(3) 2 1_554 ?
M7AS M2AS M7SB 0.00(3) 1_554 1_554 ?
S3 M3PB S9 87.28(10) . . ?
S3 M3PB S5 77.42(12) . . ?
S9 M3PB S5 74.79(10) . . ?
S3 M3PB S1 74.16(12) . . ?
S9 M3PB S1 76.57(9) . . ?
S5 M3PB S1 140.19(9) . . ?
S3 M3PB S10 152.45(10) . . ?
S9 M3PB S10 86.22(10) . . ?
S5 M3PB S10 126.15(12) . . ?
S1 M3PB S10 78.29(11) . . ?
S3 M3PB S4 84.50(9) . . ?
S9 M3PB S4 145.22(8) . . ?
S5 M3PB S4 135.26(12) . . ?
S1 M3PB S4 68.66(9) . . ?
S10 M3PB S4 85.71(8) . . ?
S3 M3PB S12 143.80(9) . . ?
S9 M3PB S12 91.66(9) . . ?
S5 M3PB S12 67.46(10) . . ?
S1 M3PB S12 140.48(11) . . ?
S10 M3PB S12 63.20(8) . . ?
S4 M3PB S12 114.36(8) . . ?
S3 M3PB S6 80.58(10) . . ?
S9 M3PB S6 147.78(8) . . ?
S5 M3PB S6 73.48(10) . . ?
S1 M3PB S6 127.18(10) . . ?
S10 M3PB S6 117.33(9) . . ?
S4 M3PB S6 63.30(8) . . ?
S12 M3PB S6 81.32(8) . . ?
S3 M3PB M4CU 126.10(8) . 2 ?
S9 M3PB M4CU 127.29(7) . 2 ?
S5 M3PB M4CU 143.71(8) . 2 ?
S1 M3PB M4CU 76.10(7) . 2 ?
S10 M3PB M4CU 44.48(7) . 2 ?
S4 M3PB M4CU 42.74(7) . 2 ?
S12 M3PB M4CU 82.12(6) . 2 ?
S6 M3PB M4CU 83.08(6) . 2 ?
S3 M3PB M4AG 126.10(8) . 2 ?
S9 M3PB M4AG 127.29(7) . 2 ?
S5 M3PB M4AG 143.71(8) . 2 ?
S1 M3PB M4AG 76.10(7) . 2 ?
S10 M3PB M4AG 44.48(7) . 2 ?
S4 M3PB M4AG 42.74(7) . 2 ?
S12 M3PB M4AG 82.12(6) . 2 ?
S6 M3PB M4AG 83.08(6) . 2 ?
M4CU M3PB M4AG 0.00(6) 2 2 ?
S3 M3PB M1MN 122.00(8) . 2 ?
S9 M3PB M1MN 131.92(7) . 2 ?
S5 M3PB M1MN 75.95(7) . 2 ?
S1 M3PB M1MN 143.43(7) . 2 ?
S10 M3PB M1MN 81.26(6) . 2 ?
S4 M3PB M1MN 79.90(6) . 2 ?
S12 M3PB M1MN 41.60(7) . 2 ?
S6 M3PB M1MN 42.66(7) . 2 ?
M4CU M3PB M1MN 68.08(3) 2 2 ?
M4AG M3PB M1MN 68.08(3) 2 2 ?
S3 M3PB M1SB 122.00(8) . 2 ?
S9 M3PB M1SB 131.92(7) . 2 ?
S5 M3PB M1SB 75.95(7) . 2 ?
S1 M3PB M1SB 143.43(7) . 2 ?
S10 M3PB M1SB 81.26(6) . 2 ?
S4 M3PB M1SB 79.90(6) . 2 ?
S12 M3PB M1SB 41.60(7) . 2 ?
S6 M3PB M1SB 42.66(7) . 2 ?
M4CU M3PB M1SB 68.08(3) 2 2 ?
M4AG M3PB M1SB 68.08(3) 2 2 ?
M1MN M3PB M1SB 0.00(5) 2 2 ?
S3 M4AG S8 159.52(13) . . ?
S3 M4AG S4 95.46(12) . 2_545 ?
S8 M4AG S4 100.15(12) . 2_545 ?
S3 M4AG S10 99.75(12) . 2_545 ?
S8 M4AG S10 86.99(11) . 2_545 ?
S4 M4AG S10 110.99(11) 2_545 2_545 ?
S3 M4AG S11 83.17(11) . 1_554 ?
S8 M4AG S11 79.90(11) . 1_554 ?
S4 M4AG S11 173.92(12) 2_545 1_554 ?
S10 M4AG S11 75.09(12) 2_545 1_554 ?
S3 M4AG S5 75.64(12) . . ?
S8 M4AG S5 94.52(12) . . ?
S4 M4AG S5 78.47(11) 2_545 . ?
S10 M4AG S5 170.04(12) 2_545 . ?
S11 M4AG S5 95.46(9) 1_554 . ?
S3 M4AG M2SB 134.69(10) . 2_545 ?
S8 M4AG M2SB 62.08(9) . 2_545 ?
S4 M4AG M2SB 39.23(8) 2_545 2_545 ?
S10 M4AG M2SB 98.29(9) 2_545 2_545 ?
S11 M4AG M2SB 141.83(8) 1_554 2_545 ?
S5 M4AG M2SB 91.10(8) . 2_545 ?
S3 M4AG M2AS 134.69(10) . 2_545 ?
S8 M4AG M2AS 62.08(9) . 2_545 ?
S4 M4AG M2AS 39.23(8) 2_545 2_545 ?
S10 M4AG M2AS 98.29(9) 2_545 2_545 ?
S11 M4AG M2AS 141.83(8) 1_554 2_545 ?
S5 M4AG M2AS 91.10(8) . 2_545 ?
M2SB M4AG M2AS 0.00(5) 2_545 2_545 ?
S3 M4AG M7AS 139.36(11) . 2_545 ?
S8 M4AG M7AS 49.03(9) . 2_545 ?
S4 M4AG M7AS 102.42(9) 2_545 2_545 ?
S10 M4AG M7AS 39.75(7) 2_545 2_545 ?
S11 M4AG M7AS 82.26(8) 1_554 2_545 ?
S5 M4AG M7AS 143.44(8) . 2_545 ?
M2SB M4AG M7AS 70.66(4) 2_545 2_545 ?
M2AS M4AG M7AS 70.66(4) 2_545 2_545 ?
S3 M4AG M7SB 139.36(11) . 2_545 ?
S8 M4AG M7SB 49.03(9) . 2_545 ?
S4 M4AG M7SB 102.42(9) 2_545 2_545 ?
S10 M4AG M7SB 39.75(7) 2_545 2_545 ?
S11 M4AG M7SB 82.26(8) 1_554 2_545 ?
S5 M4AG M7SB 143.44(8) . 2_545 ?
M2SB M4AG M7SB 70.66(4) 2_545 2_545 ?
M2AS M4AG M7SB 70.66(4) 2_545 2_545 ?
M7AS M4AG M7SB 0.00(5) 2_545 2_545 ?
S3 M4AG M3SB 89.31(9) . 2_545 ?
S8 M4AG M3SB 110.28(9) . 2_545 ?
S4 M4AG M3SB 57.14(8) 2_545 2_545 ?
S10 M4AG M3SB 56.25(8) 2_545 2_545 ?
S11 M4AG M3SB 128.63(9) 1_554 2_545 ?
S5 M4AG M3SB 131.58(9) . 2_545 ?
M2SB M4AG M3SB 67.44(3) 2_545 2_545 ?
M2AS M4AG M3SB 67.44(3) 2_545 2_545 ?
M7AS M4AG M3SB 71.21(3) 2_545 2_545 ?
M7SB M4AG M3SB 71.21(3) 2_545 2_545 ?
S3 M4AG M3PB 89.31(9) . 2_545 ?
S8 M4AG M3PB 110.28(9) . 2_545 ?
S4 M4AG M3PB 57.14(8) 2_545 2_545 ?
S10 M4AG M3PB 56.25(8) 2_545 2_545 ?
S11 M4AG M3PB 128.63(9) 1_554 2_545 ?
S5 M4AG M3PB 131.58(9) . 2_545 ?
M2SB M4AG M3PB 67.44(3) 2_545 2_545 ?
M2AS M4AG M3PB 67.44(3) 2_545 2_545 ?
M7AS M4AG M3PB 71.21(3) 2_545 2_545 ?
M7SB M4AG M3PB 71.21(3) 2_545 2_545 ?
M3SB M4AG M3PB 0.000(19) 2_545 2_545 ?
S8 M5SB S6 91.02(13) 3_665 . ?
S8 M5SB S2 90.79(11) 3_665 2 ?
S6 M5SB S2 89.83(11) . 2 ?
S8 M5SB S11 82.13(11) 3_665 1_554 ?
S6 M5SB S11 83.19(11) . 1_554 ?
S2 M5SB S11 169.93(10) 2 1_554 ?
S8 M5SB S5 172.56(12) 3_665 . ?
S6 M5SB S5 84.76(12) . . ?
S2 M5SB S5 83.09(11) 2 . ?
S11 M5SB S5 103.39(9) 1_554 . ?
S8 M5SB S11 83.93(11) 3_665 3_666 ?
S6 M5SB S11 170.24(10) . 3_666 ?
S2 M5SB S11 81.92(11) 2 3_666 ?
S11 M5SB S11 104.30(9) 1_554 3_666 ?
S5 M5SB S11 99.32(10) . 3_666 ?
S8 M5SB M7AS 49.04(9) 3_665 4_675 ?
S6 M5SB M7AS 86.17(8) . 4_675 ?
S2 M5SB M7AS 42.08(8) 2 4_675 ?
S11 M5SB M7AS 129.73(7) 1_554 4_675 ?
S5 M5SB M7AS 124.35(8) . 4_675 ?
S11 M5SB M7AS 84.22(6) 3_666 4_675 ?
S8 M5SB M7SB 49.04(9) 3_665 4_675 ?
S6 M5SB M7SB 86.17(8) . 4_675 ?
S2 M5SB M7SB 42.08(8) 2 4_675 ?
S11 M5SB M7SB 129.73(7) 1_554 4_675 ?
S5 M5SB M7SB 124.35(8) . 4_675 ?
S11 M5SB M7SB 84.22(6) 3_666 4_675 ?
M7AS M5SB M7SB 0.00(4) 4_675 4_675 ?
S8 M5SB M5SB 78.60(9) 3_665 3_665 ?
S6 M5SB M5SB 135.25(11) . 3_665 ?
S2 M5SB M5SB 133.15(8) 2 3_665 ?
S11 M5SB M5SB 52.46(7) 1_554 3_665 ?
S5 M5SB M5SB 108.69(8) . 3_665 ?
S11 M5SB M5SB 51.84(8) 3_666 3_665 ?
M7AS M5SB M5SB 115.86(4) 4_675 3_665 ?
M7SB M5SB M5SB 115.86(4) 4_675 3_665 ?
S8 M5SB M6SB 49.57(9) 3_665 2 ?
S6 M5SB M6SB 41.46(9) . 2 ?
S2 M5SB M6SB 90.94(8) 2 2 ?
S11 M5SB M6SB 79.02(6) 1_554 2 ?
S5 M5SB M6SB 126.02(8) . 2 ?
S11 M5SB M6SB 132.97(7) 3_666 2 ?
M7AS M5SB M6SB 61.47(3) 4_675 2 ?
M7SB M5SB M6SB 61.47(3) 4_675 2 ?
M5SB M5SB M6SB 113.78(5) 3_665 2 ?
S8 M5SB M10 120.47(10) 3_665 3_666 ?
S6 M5SB M10 147.76(11) . 3_666 ?
S2 M5SB M10 83.48(8) 2 3_666 ?
S11 M5SB M10 106.26(7) 1_554 3_666 ?
S5 M5SB M10 63.16(8) . 3_666 ?
S11 M5SB M10 36.55(7) 3_666 3_666 ?
M7AS M5SB M10 108.53(3) 4_675 3_666 ?
M7SB M5SB M10 108.53(3) 4_675 3_666 ?
M5SB M5SB M10 64.53(4) 3_665 3_666 ?
M6SB M5SB M10 168.71(4) 2 3_666 ?
S8 M5SB M1MN 99.65(10) 3_665 2 ?
S6 M5SB M1MN 42.19(9) . 2 ?
S2 M5SB M1MN 48.87(8) 2 2 ?
S11 M5SB M1MN 125.18(7) 1_554 2 ?
S5 M5SB M1MN 73.13(8) . 2 ?
S11 M5SB M1MN 130.49(9) 3_666 2 ?
M7AS M5SB M1MN 63.96(3) 4_675 2 ?
M7SB M5SB M1MN 63.96(3) 4_675 2 ?
M5SB M5SB M1MN 177.11(5) 3_665 2 ?
M6SB M5SB M1MN 63.46(3) 2 2 ?
M10 M5SB M1MN 118.35(4) 3_666 2 ?
S12 M6SB S6 97.29(11) 2_546 2_545 ?
S12 M6SB S9 88.71(12) 2_546 . ?
S6 M6SB S9 88.06(11) 2_545 . ?
S12 M6SB S8 91.79(10) 2_546 4_566 ?
S6 M6SB S8 82.19(10) 2_545 4_566 ?
S9 M6SB S8 170.22(12) . 4_566 ?
S12 M6SB S1 163.34(10) 2_546 . ?
S6 M6SB S1 85.62(12) 2_545 . ?
S9 M6SB S1 74.95(11) . . ?
S8 M6SB S1 104.87(10) 4_566 . ?
S12 M6SB S7 83.96(12) 2_546 . ?
S6 M6SB S7 169.55(10) 2_545 . ?
S9 M6SB S7 81.58(10) . . ?
S8 M6SB S7 108.19(10) 4_566 . ?
S1 M6SB S7 90.30(10) . . ?
S12 M6SB M10 38.56(7) 2_546 2_546 ?
S6 M6SB M10 89.36(9) 2_545 2_546 ?
S9 M6SB M10 126.24(10) . 2_546 ?
S8 M6SB M10 53.27(8) 4_566 2_546 ?
S1 M6SB M10 158.09(7) . 2_546 ?
S7 M6SB M10 97.88(8) . 2_546 ?
S12 M6SB M5SB 95.52(9) 2_546 2_545 ?
S6 M6SB M5SB 41.46(7) 2_545 2_545 ?
S9 M6SB M5SB 129.50(9) . 2_545 ?
S8 M6SB M5SB 40.73(8) 4_566 2_545 ?
S1 M6SB M5SB 97.42(8) . 2_545 ?
S7 M6SB M5SB 148.92(7) . 2_545 ?
M10 M6SB M5SB 65.57(3) 2_546 2_545 ?
S12 M6SB M7AS 138.51(8) 2_546 3_566 ?
S6 M6SB M7AS 84.01(8) 2_545 3_566 ?
S9 M6SB M7AS 132.71(10) . 3_566 ?
S8 M6SB M7AS 47.09(8) 4_566 3_566 ?
S1 M6SB M7AS 58.02(6) . 3_566 ?
S7 M6SB M7AS 101.98(7) . 3_566 ?
M10 M6SB M7AS 100.27(3) 2_546 3_566 ?
M5SB M6SB M7AS 58.83(3) 2_545 3_566 ?
S12 M6SB M7SB 138.51(8) 2_546 3_566 ?
S6 M6SB M7SB 84.01(8) 2_545 3_566 ?
S9 M6SB M7SB 132.71(10) . 3_566 ?
S8 M6SB M7SB 47.09(8) 4_566 3_566 ?
S1 M6SB M7SB 58.02(6) . 3_566 ?
S7 M6SB M7SB 101.98(7) . 3_566 ?
M10 M6SB M7SB 100.27(3) 2_546 3_566 ?
M5SB M6SB M7SB 58.83(3) 2_545 3_566 ?
M7AS M6SB M7SB 0.000(16) 3_566 3_566 ?
S12 M6SB M2SB 87.34(8) 2_546 3_566 ?
S6 M6SB M2SB 136.39(7) 2_545 3_566 ?
S9 M6SB M2SB 135.51(9) . 3_566 ?
S8 M6SB M2SB 54.27(8) 4_566 3_566 ?
S1 M6SB M2SB 101.91(7) . 3_566 ?
S7 M6SB M2SB 53.93(6) . 3_566 ?
M10 M6SB M2SB 67.79(3) 2_546 3_566 ?
M5SB M6SB M2SB 94.98(3) 2_545 3_566 ?
M7AS M6SB M2SB 65.52(3) 3_566 3_566 ?
M7SB M6SB M2SB 65.52(3) 3_566 3_566 ?
S12 M6SB M2AS 87.34(8) 2_546 3_566 ?
S6 M6SB M2AS 136.39(7) 2_545 3_566 ?
S9 M6SB M2AS 135.51(9) . 3_566 ?
S8 M6SB M2AS 54.27(8) 4_566 3_566 ?
S1 M6SB M2AS 101.91(7) . 3_566 ?
S7 M6SB M2AS 53.93(6) . 3_566 ?
M10 M6SB M2AS 67.79(3) 2_546 3_566 ?
M5SB M6SB M2AS 94.98(3) 2_545 3_566 ?
M7AS M6SB M2AS 65.52(3) 3_566 3_566 ?
M7SB M6SB M2AS 65.52(3) 3_566 3_566 ?
M2SB M6SB M2AS 0.000(19) 3_566 3_566 ?
S10 M7SB S2 92.22(13) . 3_566 ?
S10 M7SB S7 91.27(12) . . ?
S2 M7SB S7 89.03(12) 3_566 . ?
S10 M7SB S8 86.09(12) . 2 ?
S2 M7SB S8 84.83(10) 3_566 2 ?
S7 M7SB S8 173.21(12) . 2 ?
S10 M7SB S1 86.85(12) . . ?
S2 M7SB S1 168.75(10) 3_566 . ?
S7 M7SB S1 102.20(10) . . ?
S8 M7SB S1 83.92(10) 2 . ?
S10 M7SB S1 173.44(10) . 3_566 ?
S2 M7SB S1 91.41(11) 3_566 3_566 ?
S7 M7SB S1 83.33(9) . 3_566 ?
S8 M7SB S1 99.68(10) 2 3_566 ?
S1 M7SB S1 90.64(10) . 3_566 ?
S10 M7SB M9AG 44.63(10) . 2_556 ?
S2 M7SB M9AG 48.03(8) 3_566 2_556 ?
S7 M7SB M9AG 85.15(9) . 2_556 ?
S8 M7SB M9AG 88.58(8) 2 2_556 ?
S1 M7SB M9AG 131.36(7) . 2_556 ?
S1 M7SB M9AG 137.95(9) 3_566 2_556 ?
S10 M7SB M9MN 44.63(10) . 2_556 ?
S2 M7SB M9MN 48.03(8) 3_566 2_556 ?
S7 M7SB M9MN 85.15(9) . 2_556 ?
S8 M7SB M9MN 88.58(8) 2 2_556 ?
S1 M7SB M9MN 131.36(7) . 2_556 ?
S1 M7SB M9MN 137.95(9) 3_566 2_556 ?
M9AG M7SB M9MN 0.00(5) 2_556 2_556 ?
S10 M7SB M4CU 45.38(10) . 2 ?
S2 M7SB M4CU 97.62(9) 3_566 2 ?
S7 M7SB M4CU 136.13(8) . 2 ?
S8 M7SB M4CU 42.49(8) 2 2 ?
S1 M7SB M4CU 73.82(7) . 2 ?
S1 M7SB M4CU 139.30(7) 3_566 2 ?
M9AG M7SB M4CU 68.67(4) 2_556 2 ?
M9MN M7SB M4CU 68.67(4) 2_556 2 ?
S10 M7SB M4AG 45.38(10) . 2 ?
S2 M7SB M4AG 97.62(9) 3_566 2 ?
S7 M7SB M4AG 136.13(8) . 2 ?
S8 M7SB M4AG 42.49(8) 2 2 ?
S1 M7SB M4AG 73.82(7) . 2 ?
S1 M7SB M4AG 139.30(7) 3_566 2 ?
M9AG M7SB M4AG 68.67(4) 2_556 2 ?
M9MN M7SB M4AG 68.67(4) 2_556 2 ?
M4CU M7SB M4AG 0.00(5) 2 2 ?
S10 M7SB M5SB 92.71(8) . 4_576 ?
S2 M7SB M5SB 43.94(8) 3_566 4_576 ?
S7 M7SB M5SB 132.90(10) . 4_576 ?
S8 M7SB M5SB 41.19(8) 2 4_576 ?
S1 M7SB M5SB 124.87(7) . 4_576 ?
S1 M7SB M5SB 93.70(6) 3_566 4_576 ?
M9AG M7SB M5SB 66.08(3) 2_556 4_576 ?
M9MN M7SB M5SB 66.08(3) 2_556 4_576 ?
M4CU M7SB M5SB 67.71(3) 2 4_576 ?
M4AG M7SB M5SB 67.71(3) 2 4_576 ?
S10 M7SB M6SB 133.62(10) . 3_566 ?
S2 M7SB M6SB 90.82(8) 3_566 3_566 ?
S7 M7SB M6SB 135.06(8) . 3_566 ?
S8 M7SB M6SB 48.16(8) 2 3_566 ?
S1 M7SB M6SB 81.79(7) . 3_566 ?
S1 M7SB M6SB 51.75(6) 3_566 3_566 ?
M9AG M7SB M6SB 125.73(3) 2_556 3_566 ?
M9MN M7SB M6SB 125.73(3) 2_556 3_566 ?
M4CU M7SB M6SB 88.36(4) 2 3_566 ?
M4AG M7SB M6SB 88.36(4) 2 3_566 ?
M5SB M7SB M6SB 59.71(2) 4_576 3_566 ?
S3 M8PB S4 87.09(10) 1_556 1_556 ?
S3 M8PB S9 96.12(11) 1_556 . ?
S4 M8PB S9 146.60(8) 1_556 . ?
S3 M8PB S10 152.89(10) 1_556 . ?
S4 M8PB S10 78.12(9) 1_556 . ?
S9 M8PB S10 84.62(11) . . ?
S3 M8PB S7 79.75(11) 1_556 . ?
S4 M8PB S7 69.58(10) 1_556 . ?
S9 M8PB S7 78.28(10) . . ?
S10 M8PB S7 73.86(10) . . ?
S3 M8PB S11 79.18(10) 1_556 . ?
S4 M8PB S11 139.46(10) 1_556 . ?
S9 M8PB S11 73.33(10) . . ?
S10 M8PB S11 126.32(10) . . ?
S7 M8PB S11 142.30(9) . . ?
S3 M8PB S6 83.90(10) 1_556 1_556 ?
S4 M8PB S6 68.13(8) 1_556 1_556 ?
S9 M8PB S6 145.25(9) . 1_556 ?
S10 M8PB S6 110.69(10) . 1_556 ?
S7 M8PB S6 135.17(11) . 1_556 ?
S11 M8PB S6 72.56(9) . 1_556 ?
S3 M8PB S12 141.73(9) 1_556 . ?
S4 M8PB S12 109.11(9) 1_556 . ?
S9 M8PB S12 88.69(9) . . ?
S10 M8PB S12 65.29(8) . . ?
S7 M8PB S12 138.08(11) . . ?
S11 M8PB S12 65.89(8) . . ?
S6 M8PB S12 71.48(9) 1_556 . ?
S3 M8PB M9AG 126.35(7) 1_556 2_556 ?
S4 M8PB M9AG 39.85(8) 1_556 2_556 ?
S9 M8PB M9AG 122.99(7) . 2_556 ?
S10 M8PB M9AG 39.89(8) . 2_556 ?
S7 M8PB M9AG 74.89(7) . 2_556 ?
S11 M8PB M9AG 142.10(6) . 2_556 ?
S6 M8PB M9AG 82.17(6) 1_556 2_556 ?
S12 M8PB M9AG 79.67(6) . 2_556 ?
S3 M8PB M9MN 126.35(7) 1_556 2_556 ?
S4 M8PB M9MN 39.85(8) 1_556 2_556 ?
S9 M8PB M9MN 122.99(7) . 2_556 ?
S10 M8PB M9MN 39.89(8) . 2_556 ?
S7 M8PB M9MN 74.89(7) . 2_556 ?
S11 M8PB M9MN 142.10(6) . 2_556 ?
S6 M8PB M9MN 82.17(6) 1_556 2_556 ?
S12 M8PB M9MN 79.67(6) . 2_556 ?
M9AG M8PB M9MN 0.00(6) 2_556 2_556 ?
S3 M8PB M2SB 76.31(7) 1_556 1_556 ?
S4 M8PB M2SB 34.73(6) 1_556 1_556 ?
S9 M8PB M2SB 113.96(6) . 1_556 ?
S10 M8PB M2SB 78.66(7) . 1_556 ?
S7 M8PB M2SB 35.68(8) . 1_556 ?
S11 M8PB M2SB 155.01(8) . 1_556 ?
S6 M8PB M2SB 99.87(7) 1_556 1_556 ?
S12 M8PB M2SB 135.46(6) . 1_556 ?
M9AG M8PB M2SB 55.79(3) 2_556 1_556 ?
M9MN M8PB M2SB 55.79(3) 2_556 1_556 ?
S3 M8PB M2AS 76.31(7) 1_556 1_556 ?
S4 M8PB M2AS 34.73(6) 1_556 1_556 ?
S9 M8PB M2AS 113.96(6) . 1_556 ?
S10 M8PB M2AS 78.66(7) . 1_556 ?
S7 M8PB M2AS 35.68(8) . 1_556 ?
S11 M8PB M2AS 155.01(8) . 1_556 ?
S6 M8PB M2AS 99.87(7) 1_556 1_556 ?
S12 M8PB M2AS 135.46(6) . 1_556 ?
M9AG M8PB M2AS 55.79(3) 2_556 1_556 ?
M9MN M8PB M2AS 55.79(3) 2_556 1_556 ?
M2SB M8PB M2AS 0.000(18) 1_556 1_556 ?
S4 M9MN S10 96.97(10) 2_545 2_546 ?
S4 M9MN S5 93.13(13) 2_545 . ?
S10 M9MN S5 168.63(14) 2_546 . ?
S4 M9MN S11 173.64(12) 2_545 . ?
S10 M9MN S11 89.27(12) 2_546 . ?
S5 M9MN S11 80.55(11) . . ?
S4 M9MN S9 89.92(11) 2_545 . ?
S10 M9MN S9 92.37(12) 2_546 . ?
S5 M9MN S9 82.40(13) . . ?
S11 M9MN S9 88.58(11) . . ?
S4 M9MN S2 91.93(11) 2_545 4_666 ?
S10 M9MN S2 85.11(11) 2_546 4_666 ?
S5 M9MN S2 99.80(13) . 4_666 ?
S11 M9MN S2 89.82(11) . 4_666 ?
S9 M9MN S2 177.04(15) . 4_666 ?
S4 M9MN M10 133.42(10) 2_545 . ?
S10 M9MN M10 129.45(10) 2_546 . ?
S5 M9MN M10 41.21(10) . . ?
S11 M9MN M10 40.49(8) . . ?
S9 M9MN M10 91.58(8) . . ?
S2 M9MN M10 88.83(7) 4_666 . ?
S4 M9MN M7AS 91.61(8) 2_545 2_546 ?
S10 M9MN M7AS 41.49(7) 2_546 2_546 ?
S5 M9MN M7AS 143.67(10) . 2_546 ?
S11 M9MN M7AS 93.89(9) . 2_546 ?
S9 M9MN M7AS 133.63(10) . 2_546 ?
S2 M9MN M7AS 44.01(8) 4_666 2_546 ?
M10 M9MN M7AS 119.16(4) . 2_546 ?
S4 M9MN M7SB 91.61(8) 2_545 2_546 ?
S10 M9MN M7SB 41.49(7) 2_546 2_546 ?
S5 M9MN M7SB 143.67(10) . 2_546 ?
S11 M9MN M7SB 93.89(9) . 2_546 ?
S9 M9MN M7SB 133.63(10) . 2_546 ?
S2 M9MN M7SB 44.01(8) 4_666 2_546 ?
M10 M9MN M7SB 119.16(4) . 2_546 ?
M7AS M9MN M7SB 0.00(4) 2_546 2_546 ?
S4 M9MN M2SB 37.46(7) 2_545 2_545 ?
S10 M9MN M2SB 90.51(8) 2_546 2_545 ?
S5 M9MN M2SB 100.70(11) . 2_545 ?
S11 M9MN M2SB 144.24(9) . 2_545 ?
S9 M9MN M2SB 127.15(9) . 2_545 ?
S2 M9MN M2SB 54.55(8) 4_666 2_545 ?
M10 M9MN M2SB 125.11(5) . 2_545 ?
M7AS M9MN M2SB 63.85(4) 2_546 2_545 ?
M7SB M9MN M2SB 63.85(4) 2_546 2_545 ?
S4 M9MN M2AS 37.46(7) 2_545 2_545 ?
S10 M9MN M2AS 90.51(8) 2_546 2_545 ?
S5 M9MN M2AS 100.70(11) . 2_545 ?
S11 M9MN M2AS 144.24(9) . 2_545 ?
S9 M9MN M2AS 127.15(9) . 2_545 ?
S2 M9MN M2AS 54.55(8) 4_666 2_545 ?
M10 M9MN M2AS 125.11(5) . 2_545 ?
M7AS M9MN M2AS 63.85(4) 2_546 2_545 ?
M7SB M9MN M2AS 63.85(4) 2_546 2_545 ?
M2SB M9MN M2AS 0.00(5) 2_545 2_545 ?
S4 M9MN M8PB 49.28(8) 2_545 2_546 ?
S10 M9MN M8PB 49.95(8) 2_546 2_546 ?
S5 M9MN M8PB 137.75(10) . 2_546 ?
S11 M9MN M8PB 136.29(10) . 2_546 ?
S9 M9MN M8PB 79.56(7) . 2_546 ?
S2 M9MN M8PB 99.93(7) 4_666 2_546 ?
M10 M9MN M8PB 170.93(4) . 2_546 ?
M7AS M9MN M8PB 67.07(3) 2_546 2_546 ?
M7SB M9MN M8PB 67.07(3) 2_546 2_546 ?
M2SB M9MN M8PB 62.93(3) 2_545 2_546 ?
M2AS M9MN M8PB 62.93(3) 2_545 2_546 ?
S11 M10 S5 93.82(13) . . ?
S11 M10 S12 97.38(14) . . ?
S5 M10 S12 96.51(14) . . ?
S11 M10 S8 85.21(13) . 3_666 ?
S5 M10 S8 172.74(13) . 3_666 ?
S12 M10 S8 90.76(12) . 3_666 ?
S11 M10 S2 172.90(12) . 2 ?
S5 M10 S2 85.56(13) . 2 ?
S12 M10 S2 89.71(12) . 2 ?
S8 M10 S2 94.51(9) 3_666 2 ?
S11 M10 M9MN 47.76(11) . . ?
S5 M10 M9MN 47.50(10) . . ?
S12 M10 M9MN 109.65(8) . . ?
S8 M10 M9MN 129.57(8) 3_666 . ?
S2 M10 M9MN 129.69(8) 2 . ?
S11 M10 S5 100.95(11) . 3_666 ?
S5 M10 S5 94.57(12) . 3_666 ?
S12 M10 S5 157.85(11) . 3_666 ?
S8 M10 S5 78.58(10) 3_666 3_666 ?
S2 M10 S5 72.08(9) 2 3_666 ?
M9MN M10 S5 91.95(6) . 3_666 ?
S11 M10 M6SB 90.78(11) . 2_556 ?
S5 M10 M6SB 138.01(11) . 2_556 ?
S12 M10 M6SB 41.55(9) . 2_556 ?
S8 M10 M6SB 49.25(8) 3_666 2_556 ?
S2 M10 M6SB 94.41(7) 2 2_556 ?
M9MN M10 M6SB 131.07(5) . 2_556 ?
S5 M10 M6SB 125.41(7) 3_666 2_556 ?
S11 M10 M5SB 53.30(9) . 3_666 ?
S5 M10 M5SB 102.23(10) . 3_666 ?
S12 M10 M5SB 145.72(12) . 3_666 ?
S8 M10 M5SB 71.44(8) 3_666 3_666 ?
S2 M10 M5SB 119.91(7) 2 3_666 ?
M9MN M10 M5SB 66.05(3) . 3_666 ?
S5 M10 M5SB 48.11(7) 3_666 3_666 ?
M6SB M10 M5SB 113.65(5) 2_556 3_666 ?
S11 M10 M1MN 137.81(10) . 2 ?
S5 M10 M1MN 83.19(10) . 2 ?
S12 M10 M1MN 41.91(10) . 2 ?
S8 M10 M1MN 102.36(8) 3_666 2 ?
S2 M10 M1MN 49.18(7) 2 2 ?
M9MN M10 M1MN 123.90(5) . 2 ?
S5 M10 M1MN 121.24(8) 3_666 2 ?
M6SB M10 M1MN 66.21(4) 2_556 2 ?
M5SB M10 M1MN 167.91(5) 3_666 2 ?
S11 M10 M1SB 137.81(10) . 2 ?
S5 M10 M1SB 83.19(10) . 2 ?
S12 M10 M1SB 41.91(10) . 2 ?
S8 M10 M1SB 102.36(8) 3_666 2 ?
S2 M10 M1SB 49.18(7) 2 2 ?
M9MN M10 M1SB 123.90(5) . 2 ?
S5 M10 M1SB 121.24(8) 3_666 2 ?
M6SB M10 M1SB 66.21(4) 2_556 2 ?
M5SB M10 M1SB 167.91(5) 3_666 2 ?
M1MN M10 M1SB 0.00(4) 2 2 ?
M2AS S1 M1SB 95.45(15) . . ?
M2AS S1 M3PB 100.76(12) . . ?
M1SB S1 M3PB 96.30(11) . . ?
M2AS S1 M7SB 100.24(13) . . ?
M1SB S1 M7SB 161.05(13) . . ?
M3PB S1 M7SB 91.16(11) . . ?
M2AS S1 M6SB 165.49(14) . . ?
M1SB S1 M6SB 82.70(9) . . ?
M3PB S1 M6SB 93.75(9) . . ?
M7SB S1 M6SB 79.44(10) . . ?
M2AS S1 M7AS 95.28(11) . 3_566 ?
M1SB S1 M7AS 78.63(9) . 3_566 ?
M3PB S1 M7AS 163.59(12) . 3_566 ?
M7SB S1 M7AS 89.36(10) . 3_566 ?
M6SB S1 M7AS 70.23(7) . 3_566 ?
M2AS S1 M7SB 95.28(11) . 3_566 ?
M1SB S1 M7SB 78.63(9) . 3_566 ?
M3PB S1 M7SB 163.59(12) . 3_566 ?
M7SB S1 M7SB 89.36(10) . 3_566 ?
M6SB S1 M7SB 70.23(7) . 3_566 ?
M7AS S1 M7SB 0.000(16) 3_566 3_566 ?
M2AS S1 M4AG 60.51(9) . 2 ?
M1SB S1 M4AG 138.92(12) . 2 ?
M3PB S1 M4AG 60.72(7) . 2 ?
M7SB S1 M4AG 59.49(7) . 2 ?
M6SB S1 M4AG 128.79(13) . 2 ?
M7AS S1 M4AG 132.19(10) 3_566 2 ?
M7SB S1 M4AG 132.19(10) 3_566 2 ?
M7AS S2 M7SB 0.00(6) 3_566 3_566 ?
M7AS S2 M5SB 93.98(13) 3_566 2_545 ?
M7SB S2 M5SB 93.98(13) 3_566 2_545 ?
M7AS S2 M9AG 87.96(11) 3_566 4_565 ?
M7SB S2 M9AG 87.96(11) 3_566 4_565 ?
M5SB S2 M9AG 98.60(11) 2_545 4_565 ?
M7AS S2 M9MN 87.96(11) 3_566 4_565 ?
M7SB S2 M9MN 87.96(11) 3_566 4_565 ?
M5SB S2 M9MN 98.60(11) 2_545 4_565 ?
M9AG S2 M9MN 0.00(5) 4_565 4_565 ?
M7AS S2 M1SB 95.59(11) 3_566 . ?
M7SB S2 M1SB 95.59(11) 3_566 . ?
M5SB S2 M1SB 89.89(10) 2_545 . ?
M9AG S2 M1SB 170.56(16) 4_565 . ?
M9MN S2 M1SB 170.56(16) 4_565 . ?
M7AS S2 M2AS 87.31(9) 3_566 3_565 ?
M7SB S2 M2AS 87.31(9) 3_566 3_565 ?
M5SB S2 M2AS 178.31(15) 2_545 3_565 ?
M9AG S2 M2AS 80.35(9) 4_565 3_565 ?
M9MN S2 M2AS 80.35(9) 4_565 3_565 ?
M1SB S2 M2AS 91.06(10) . 3_565 ?
M7AS S2 M2SB 87.31(9) 3_566 3_565 ?
M7SB S2 M2SB 87.31(9) 3_566 3_565 ?
M5SB S2 M2SB 178.31(15) 2_545 3_565 ?
M9AG S2 M2SB 80.35(9) 4_565 3_565 ?
M9MN S2 M2SB 80.35(9) 4_565 3_565 ?
M1SB S2 M2SB 91.06(10) . 3_565 ?
M2AS S2 M2SB 0.00(6) 3_565 3_565 ?
M7AS S2 M10 171.12(14) 3_566 2_545 ?
M7SB S2 M10 171.12(14) 3_566 2_545 ?
M5SB S2 M10 91.26(9) 2_545 2_545 ?
M9AG S2 M10 98.34(11) 4_565 2_545 ?
M9MN S2 M10 98.34(11) 4_565 2_545 ?
M1SB S2 M10 77.24(9) . 2_545 ?
M2AS S2 M10 87.59(10) 3_565 2_545 ?
M2SB S2 M10 87.59(10) 3_565 2_545 ?
M7AS S2 M10 123.90(11) 3_566 4_565 ?
M7SB S2 M10 123.90(11) 3_566 4_565 ?
M5SB S2 M10 60.35(7) 2_545 4_565 ?
M9AG S2 M10 53.30(6) 4_565 4_565 ?
M9MN S2 M10 53.30(6) 4_565 4_565 ?
M1SB S2 M10 129.60(9) . 4_565 ?
M2AS S2 M10 118.00(10) 3_565 4_565 ?
M2SB S2 M10 118.00(10) 3_565 4_565 ?
M10 S2 M10 64.97(7) 2_545 4_565 ?
M7AS S2 M6SB 56.23(7) 3_566 . ?
M7SB S2 M6SB 56.23(7) 3_566 . ?
M5SB S2 M6SB 54.79(7) 2_545 . ?
M9AG S2 M6SB 128.47(12) 4_565 . ?
M9MN S2 M6SB 128.47(12) 4_565 . ?
M1SB S2 M6SB 60.16(7) . . ?
M2AS S2 M6SB 126.90(10) 3_565 . ?
M2SB S2 M6SB 126.90(10) 3_565 . ?
M10 S2 M6SB 122.39(8) 2_545 . ?
M10 S2 M6SB 114.47(8) 4_565 . ?
M4AG S3 M1SB 118.02(13) . . ?
M4AG S3 M3PB 115.75(15) . . ?
M1SB S3 M3PB 110.45(13) . . ?
M4AG S3 M8PB 111.01(14) . 1_554 ?
M1SB S3 M8PB 104.31(13) . 1_554 ?
M3PB S3 M8PB 94.04(9) . 1_554 ?
M4AG S3 M2AS 175.39(14) . . ?
M1SB S3 M2AS 63.71(7) . . ?
M3PB S3 M2AS 66.27(7) . . ?
M8PB S3 M2AS 64.44(6) 1_554 . ?
M4AG S3 M3SB 57.66(7) . 2_545 ?
M1SB S3 M3SB 60.44(7) . 2_545 ?
M3PB S3 M3SB 136.86(11) . 2_545 ?
M8PB S3 M3SB 128.92(11) 1_554 2_545 ?
M2AS S3 M3SB 124.14(9) . 2_545 ?
M4AG S3 M3PB 57.66(7) . 2_545 ?
M1SB S3 M3PB 60.44(7) . 2_545 ?
M3PB S3 M3PB 136.86(11) . 2_545 ?
M8PB S3 M3PB 128.92(11) 1_554 2_545 ?
M2AS S3 M3PB 124.14(9) . 2_545 ?
M3SB S3 M3PB 0.000(19) 2_545 2_545 ?
M4AG S3 M5SB 61.27(8) . . ?
M1SB S3 M5SB 175.30(14) . . ?
M3PB S3 M5SB 73.36(8) . . ?
M8PB S3 M5SB 72.31(7) 1_554 . ?
M2AS S3 M5SB 116.61(7) . . ?
M3SB S3 M5SB 118.90(7) 2_545 . ?
M3PB S3 M5SB 118.90(7) 2_545 . ?
M2AS S4 M9AG 100.63(13) . 2 ?
M2AS S4 M9MN 100.63(13) . 2 ?
M9AG S4 M9MN 0.00(6) 2 2 ?
M2AS S4 M4CU 95.97(14) . 2 ?
M9AG S4 M4CU 102.60(11) 2 2 ?
M9MN S4 M4CU 102.60(11) 2 2 ?
M2AS S4 M4AG 95.97(14) . 2 ?
M9AG S4 M4AG 102.60(11) 2 2 ?
M9MN S4 M4AG 102.60(11) 2 2 ?
M4CU S4 M4AG 0.00(5) 2 2 ?
M2AS S4 M8PB 97.53(11) . 1_554 ?
M9AG S4 M8PB 90.87(13) 2 1_554 ?
M9MN S4 M8PB 90.87(13) 2 1_554 ?
M4CU S4 M8PB 158.82(14) 2 1_554 ?
M4AG S4 M8PB 158.82(14) 2 1_554 ?
M2AS S4 M3PB 94.90(12) . . ?
M9AG S4 M3PB 163.81(13) 2 . ?
M9MN S4 M3PB 163.81(13) 2 . ?
M4CU S4 M3PB 80.12(11) 2 . ?
M4AG S4 M3PB 80.12(11) 2 . ?
M8PB S4 M3PB 82.53(8) 1_554 . ?
M2AS S4 M7AS 60.34(9) . 1_554 ?
M9AG S4 M7AS 53.80(7) 2 1_554 ?
M9MN S4 M7AS 53.80(7) 2 1_554 ?
M4CU S4 M7AS 136.35(11) 2 1_554 ?
M4AG S4 M7AS 136.35(11) 2 1_554 ?
M8PB S4 M7AS 64.82(7) 1_554 1_554 ?
M3PB S4 M7AS 133.60(8) . 1_554 ?
M2AS S4 M7SB 60.34(9) . 1_554 ?
M9AG S4 M7SB 53.80(7) 2 1_554 ?
M9MN S4 M7SB 53.80(7) 2 1_554 ?
M4CU S4 M7SB 136.35(11) 2 1_554 ?
M4AG S4 M7SB 136.35(11) 2 1_554 ?
M8PB S4 M7SB 64.82(7) 1_554 1_554 ?
M3PB S4 M7SB 133.60(8) . 1_554 ?
M7AS S4 M7SB 0.00(2) 1_554 1_554 ?
M2AS S4 M1MN 147.73(16) . 2 ?
M9AG S4 M1MN 109.43(9) 2 2 ?
M9MN S4 M1MN 109.43(9) 2 2 ?
M4CU S4 M1MN 66.70(7) 2 2 ?
M4AG S4 M1MN 66.70(7) 2 2 ?
M8PB S4 M1MN 93.55(8) 1_554 2 ?
M3PB S4 M1MN 56.60(5) . 2 ?
M7AS S4 M1MN 149.90(10) 1_554 2 ?
M7SB S4 M1MN 149.90(10) 1_554 2 ?
M10 S5 M9MN 91.29(16) . . ?
M10 S5 M3PB 103.76(16) . . ?
M9MN S5 M3PB 100.33(14) . . ?
M10 S5 M5SB 99.77(13) . . ?
M9MN S5 M5SB 153.60(17) . . ?
M3PB S5 M5SB 100.18(12) . . ?
M10 S5 M4AG 165.14(17) . . ?
M9MN S5 M4AG 85.51(10) . . ?
M3PB S5 M4AG 91.10(11) . . ?
M5SB S5 M4AG 77.66(11) . . ?
M10 S5 M10 85.43(12) . 3_666 ?
M9MN S5 M10 88.56(11) . 3_666 ?
M3PB S5 M10 166.94(17) . 3_666 ?
M5SB S5 M10 68.73(9) . 3_666 ?
M4AG S5 M10 79.99(10) . 3_666 ?
M10 S5 M1MN 63.94(9) . 2 ?
M9MN S5 M1MN 142.40(17) . 2 ?
M3PB S5 M1MN 62.56(7) . 2 ?
M5SB S5 M1MN 63.11(7) . 2 ?
M4AG S5 M1MN 125.40(12) . 2 ?
M10 S5 M1MN 115.19(10) 3_666 2 ?
M10 S5 M1SB 63.94(9) . 2 ?
M9MN S5 M1SB 142.40(17) . 2 ?
M3PB S5 M1SB 62.56(7) . 2 ?
M5SB S5 M1SB 63.11(7) . 2 ?
M4AG S5 M1SB 125.40(12) . 2 ?
M10 S5 M1SB 115.19(10) 3_666 2 ?
M1MN S5 M1SB 0.00(6) 2 2 ?
M10 S5 M8PB 61.55(11) . . ?
M9MN S5 M8PB 64.44(10) . . ?
M3PB S5 M8PB 58.03(8) . . ?
M5SB S5 M8PB 141.65(11) . . ?
M4AG S5 M8PB 128.73(11) . . ?
M10 S5 M8PB 135.01(12) 3_666 . ?
M1MN S5 M8PB 78.55(7) 2 . ?
M1SB S5 M8PB 78.55(7) 2 . ?
M10 S5 M5SB 50.14(8) . 3_666 ?
M9MN S5 M5SB 55.23(8) . 3_666 ?
M3PB S5 M5SB 137.28(15) . 3_666 ?
M5SB S5 M5SB 115.79(11) . 3_666 ?
M4AG S5 M5SB 117.52(10) . 3_666 ?
M10 S5 M5SB 55.79(6) 3_666 3_666 ?
M1MN S5 M5SB 113.29(9) 2 3_666 ?
M1SB S5 M5SB 113.29(9) 2 3_666 ?
M8PB S5 M5SB 79.27(7) . 3_666 ?
M5SB S6 M6SB 97.08(12) . 2 ?
M5SB S6 M1MN 98.71(12) . 2 ?
M6SB S6 M1MN 102.75(12) 2 2 ?
M5SB S6 M1SB 98.71(12) . 2 ?
M6SB S6 M1SB 102.75(12) 2 2 ?
M1MN S6 M1SB 0.00(6) 2 2 ?
M5SB S6 M8PB 105.33(11) . 1_554 ?
M6SB S6 M8PB 94.88(13) 2 1_554 ?
M1MN S6 M8PB 148.08(13) 2 1_554 ?
M1SB S6 M8PB 148.08(13) 2 1_554 ?
M5SB S6 M3PB 100.08(12) . . ?
M6SB S6 M3PB 162.45(11) 2 . ?
M1MN S6 M3PB 78.27(11) 2 . ?
M1SB S6 M3PB 78.27(11) 2 . ?
M8PB S6 M3PB 77.12(7) 1_554 . ?
M5SB S6 M7AS 58.71(6) . 4_675 ?
M6SB S6 M7AS 61.00(7) 2 4_675 ?
M1MN S6 M7AS 65.65(7) 2 4_675 ?
M1SB S6 M7AS 65.65(7) 2 4_675 ?
M8PB S6 M7AS 145.73(12) 1_554 4_675 ?
M3PB S6 M7AS 132.48(11) . 4_675 ?
M5SB S6 M7SB 58.71(6) . 4_675 ?
M6SB S6 M7SB 61.00(7) 2 4_675 ?
M1MN S6 M7SB 65.65(7) 2 4_675 ?
M1SB S6 M7SB 65.65(7) 2 4_675 ?
M8PB S6 M7SB 145.73(12) 1_554 4_675 ?
M3PB S6 M7SB 132.48(11) . 4_675 ?
M7AS S6 M7SB 0.00(4) 4_675 4_675 ?
M5SB S6 M10 64.13(9) . 1_554 ?
M6SB S6 M10 56.21(8) 2 1_554 ?
M1MN S6 M10 147.59(11) 2 1_554 ?
M1SB S6 M10 147.59(11) 2 1_554 ?
M8PB S6 M10 63.85(7) 1_554 1_554 ?
M3PB S6 M10 129.71(9) . 1_554 ?
M7AS S6 M10 82.04(6) 4_675 1_554 ?
M7SB S6 M10 82.04(6) 4_675 1_554 ?
M5SB S6 M9AG 158.49(14) . 2 ?
M6SB S6 M9AG 75.50(8) 2 2 ?
M1MN S6 M9AG 102.60(9) 2 2 ?
M1SB S6 M9AG 102.60(9) 2 2 ?
M8PB S6 M9AG 56.26(5) 1_554 2 ?
M3PB S6 M9AG 87.14(6) . 2 ?
M7AS S6 M9AG 128.99(8) 4_675 2 ?
M7SB S6 M9AG 128.99(8) 4_675 2 ?
M10 S6 M9AG 95.64(8) 1_554 2 ?
M5SB S6 M9MN 158.49(14) . 2 ?
M6SB S6 M9MN 75.50(8) 2 2 ?
M1MN S6 M9MN 102.60(9) 2 2 ?
M1SB S6 M9MN 102.60(9) 2 2 ?
M8PB S6 M9MN 56.26(5) 1_554 2 ?
M3PB S6 M9MN 87.14(6) . 2 ?
M7AS S6 M9MN 128.99(8) 4_675 2 ?
M7SB S6 M9MN 128.99(8) 4_675 2 ?
M10 S6 M9MN 95.64(8) 1_554 2 ?
M9AG S6 M9MN 0.000(15) 2 2 ?
M2SB S7 M2AS 0.00(8) 1_556 1_556 ?
M2SB S7 M7SB 99.94(13) 1_556 . ?
M2AS S7 M7SB 99.94(13) 1_556 . ?
M2SB S7 M1MN 92.85(16) 1_556 1_556 ?
M2AS S7 M1MN 92.85(16) 1_556 1_556 ?
M7SB S7 M1MN 166.90(17) . 1_556 ?
M2SB S7 M1SB 92.85(16) 1_556 1_556 ?
M2AS S7 M1SB 92.85(16) 1_556 1_556 ?
M7SB S7 M1SB 166.90(17) . 1_556 ?
M1MN S7 M1SB 0.00(3) 1_556 1_556 ?
M2SB S7 M8PB 95.23(12) 1_556 . ?
M2AS S7 M8PB 95.23(12) 1_556 . ?
M7SB S7 M8PB 93.18(12) . . ?
M1MN S7 M8PB 88.46(10) 1_556 . ?
M1SB S7 M8PB 88.46(10) 1_556 . ?
M2SB S7 M6SB 171.27(16) 1_556 . ?
M2AS S7 M6SB 171.27(16) 1_556 . ?
M7SB S7 M6SB 85.41(13) . . ?
M1MN S7 M6SB 81.56(9) 1_556 . ?
M1SB S7 M6SB 81.56(9) 1_556 . ?
M8PB S7 M6SB 91.34(10) . . ?
M2SB S7 M2SB 97.86(12) 1_556 3_566 ?
M2AS S7 M2SB 97.86(12) 1_556 3_566 ?
M7SB S7 M2SB 90.86(11) . 3_566 ?
M1MN S7 M2SB 84.53(10) 1_556 3_566 ?
M1SB S7 M2SB 84.53(10) 1_556 3_566 ?
M8PB S7 M2SB 165.43(14) . 3_566 ?
M6SB S7 M2SB 75.03(8) . 3_566 ?
M2SB S7 M2AS 97.86(12) 1_556 3_566 ?
M2AS S7 M2AS 97.86(12) 1_556 3_566 ?
M7SB S7 M2AS 90.86(11) . 3_566 ?
M1MN S7 M2AS 84.53(10) 1_556 3_566 ?
M1SB S7 M2AS 84.53(10) 1_556 3_566 ?
M8PB S7 M2AS 165.43(14) . 3_566 ?
M6SB S7 M2AS 75.03(8) . 3_566 ?
M2SB S7 M2AS 0.00(7) 3_566 3_566 ?
M2SB S7 M9AG 59.63(8) 1_556 2_556 ?
M2AS S7 M9AG 59.63(8) 1_556 2_556 ?
M7SB S7 M9AG 56.23(7) . 2_556 ?
M1MN S7 M9AG 134.80(12) 1_556 2_556 ?
M1SB S7 M9AG 134.80(12) 1_556 2_556 ?
M8PB S7 M9AG 62.16(6) . 2_556 ?
M6SB S7 M9AG 128.89(13) . 2_556 ?
M2SB S7 M9AG 130.77(10) 3_566 2_556 ?
M2AS S7 M9AG 130.77(10) 3_566 2_556 ?
M2SB S7 M9MN 59.63(8) 1_556 2_556 ?
M2AS S7 M9MN 59.63(8) 1_556 2_556 ?
M7SB S7 M9MN 56.23(7) . 2_556 ?
M1MN S7 M9MN 134.80(12) 1_556 2_556 ?
M1SB S7 M9MN 134.80(12) 1_556 2_556 ?
M8PB S7 M9MN 62.16(6) . 2_556 ?
M6SB S7 M9MN 128.89(13) . 2_556 ?
M2SB S7 M9MN 130.77(10) 3_566 2_556 ?
M2AS S7 M9MN 130.77(10) 3_566 2_556 ?
M9AG S7 M9MN 0.00(4) 2_556 2_556 ?
M5SB S8 M4AG 113.24(14) 3_665 . ?
M5SB S8 M7AS 89.77(12) 3_665 2_545 ?
M4AG S8 M7AS 88.47(12) . 2_545 ?
M5SB S8 M7SB 89.77(12) 3_665 2_545 ?
M4AG S8 M7SB 88.47(12) . 2_545 ?
M7AS S8 M7SB 0.00(6) 2_545 2_545 ?
M5SB S8 M6SB 89.70(12) 3_665 4_665 ?
M4AG S8 M6SB 156.07(15) . 4_665 ?
M7AS S8 M6SB 84.76(11) 2_545 4_665 ?
M7SB S8 M6SB 84.76(11) 2_545 4_665 ?
M5SB S8 M10 94.17(12) 3_665 3_666 ?
M4AG S8 M10 106.17(13) . 3_666 ?
M7AS S8 M10 161.76(15) 2_545 3_666 ?
M7SB S8 M10 161.76(15) 2_545 3_666 ?
M6SB S8 M10 77.48(9) 4_665 3_666 ?
M5SB S8 M2SB 170.65(16) 3_665 2_545 ?
M4AG S8 M2SB 75.67(10) . 2_545 ?
M7AS S8 M2SB 87.61(10) 2_545 2_545 ?
M7SB S8 M2SB 87.61(10) 2_545 2_545 ?
M6SB S8 M2SB 81.13(9) 4_665 2_545 ?
M10 S8 M2SB 85.64(9) 3_666 2_545 ?
M5SB S8 M2AS 170.65(16) 3_665 2_545 ?
M4AG S8 M2AS 75.67(10) . 2_545 ?
M7AS S8 M2AS 87.61(10) 2_545 2_545 ?
M7SB S8 M2AS 87.61(10) 2_545 2_545 ?
M6SB S8 M2AS 81.13(9) 4_665 2_545 ?
M10 S8 M2AS 85.64(9) 3_666 2_545 ?
M2SB S8 M2AS 0.00(5) 2_545 2_545 ?
M5SB S8 M5SB 64.93(9) 3_665 . ?
M4AG S8 M5SB 69.52(9) . . ?
M7AS S8 M5SB 133.67(12) 2_545 . ?
M7SB S8 M5SB 133.67(12) 2_545 . ?
M6SB S8 M5SB 130.00(11) 4_665 . ?
M10 S8 M5SB 63.38(7) 3_666 . ?
M2SB S8 M5SB 122.74(11) 2_545 . ?
M2AS S8 M5SB 122.74(11) 2_545 . ?
M5SB S8 M9AG 61.91(8) 3_665 1_554 ?
M4AG S8 M9AG 64.93(8) . 1_554 ?
M7AS S8 M9AG 52.88(6) 2_545 1_554 ?
M7SB S8 M9AG 52.88(6) 2_545 1_554 ?
M6SB S8 M9AG 125.80(11) 4_665 1_554 ?
M10 S8 M9AG 143.37(11) 3_666 1_554 ?
M2SB S8 M9AG 122.53(10) 2_545 1_554 ?
M2AS S8 M9AG 122.53(10) 2_545 1_554 ?
M5SB S8 M9AG 80.79(7) . 1_554 ?
M5SB S8 M9MN 61.91(8) 3_665 1_554 ?
M4AG S8 M9MN 64.93(8) . 1_554 ?
M7AS S8 M9MN 52.88(6) 2_545 1_554 ?
M7SB S8 M9MN 52.88(6) 2_545 1_554 ?
M6SB S8 M9MN 125.80(11) 4_665 1_554 ?
M10 S8 M9MN 143.37(11) 3_666 1_554 ?
M2SB S8 M9MN 122.53(10) 2_545 1_554 ?
M2AS S8 M9MN 122.53(10) 2_545 1_554 ?
M5SB S8 M9MN 80.79(7) . 1_554 ?
M9AG S8 M9MN 0.00(4) 1_554 1_554 ?
M6SB S9 M9MN 133.46(14) . . ?
M6SB S9 M3PB 114.68(13) . . ?
M9MN S9 M3PB 102.33(12) . . ?
M6SB S9 M8PB 108.19(12) . . ?
M9MN S9 M8PB 99.56(11) . . ?
M3PB S9 M8PB 88.64(9) . . ?
M6SB S9 M8PB 69.71(7) . 2_546 ?
M9MN S9 M8PB 63.86(7) . 2_546 ?
M3PB S9 M8PB 138.63(12) . 2_546 ?
M8PB S9 M8PB 130.70(12) . 2_546 ?
M6SB S9 M10 172.71(12) . . ?
M9MN S9 M10 52.12(6) . . ?
M3PB S9 M10 64.61(6) . . ?
M8PB S9 M10 64.77(6) . . ?
M8PB S9 M10 115.96(7) 2_546 . ?
M6SB S9 M7SB 63.82(7) . . ?
M9MN S9 M7SB 161.52(11) . . ?
M3PB S9 M7SB 69.22(7) . . ?
M8PB S9 M7SB 64.68(6) . . ?
M8PB S9 M7SB 133.38(7) 2_546 . ?
M10 S9 M7SB 110.08(7) . . ?
M6SB S9 M1SB 63.24(8) . . ?
M9MN S9 M1SB 109.03(11) . . ?
M3PB S9 M1SB 69.18(8) . . ?
M8PB S9 M1SB 146.69(10) . . ?
M8PB S9 M1SB 78.76(5) 2_546 . ?
M10 S9 M1SB 121.36(9) . . ?
M7SB S9 M1SB 83.86(6) . . ?
M7SB S10 M9AG 93.88(13) . 2_556 ?
M7SB S10 M9MN 93.88(13) . 2_556 ?
M9AG S10 M9MN 0.00(7) 2_556 2_556 ?
M7SB S10 M4CU 94.87(13) . 2 ?
M9AG S10 M4CU 105.37(11) 2_556 2 ?
M9MN S10 M4CU 105.37(11) 2_556 2 ?
M7SB S10 M4AG 94.87(13) . 2 ?
M9AG S10 M4AG 105.37(11) 2_556 2 ?
M9MN S10 M4AG 105.37(11) 2_556 2 ?
M4CU S10 M4AG 0.00(5) 2 2 ?
M7SB S10 M8PB 100.47(11) . . ?
M9AG S10 M8PB 90.16(13) 2_556 . ?
M9MN S10 M8PB 90.16(13) 2_556 . ?
M4CU S10 M8PB 157.38(14) 2 . ?
M4AG S10 M8PB 157.38(14) 2 . ?
M7SB S10 M3PB 102.08(13) . . ?
M9AG S10 M3PB 163.01(13) 2_556 . ?
M9MN S10 M3PB 163.01(13) 2_556 . ?
M4CU S10 M3PB 79.27(12) 2 . ?
M4AG S10 M3PB 79.27(12) 2 . ?
M8PB S10 M3PB 81.33(7) . . ?
M7SB S10 M5SB 55.41(6) . 4_576 ?
M9AG S10 M5SB 61.61(7) 2_556 4_576 ?
M9MN S10 M5SB 61.61(7) 2_556 4_576 ?
M4CU S10 M5SB 64.68(6) 2 4_576 ?
M4AG S10 M5SB 64.68(6) 2 4_576 ?
M8PB S10 M5SB 137.93(12) . 4_576 ?
M3PB S10 M5SB 133.15(12) . 4_576 ?
M7SB S10 M2SB 58.91(9) . 1_556 ?
M9AG S10 M2SB 55.43(8) 2_556 1_556 ?
M9MN S10 M2SB 55.43(8) 2_556 1_556 ?
M4CU S10 M2SB 142.18(10) 2 1_556 ?
M4AG S10 M2SB 142.18(10) 2 1_556 ?
M8PB S10 M2SB 60.39(7) . 1_556 ?
M3PB S10 M2SB 129.41(9) . 1_556 ?
M5SB S10 M2SB 77.63(6) 4_576 1_556 ?
M7SB S10 M2AS 58.91(9) . 1_556 ?
M9AG S10 M2AS 55.43(8) 2_556 1_556 ?
M9MN S10 M2AS 55.43(8) 2_556 1_556 ?
M4CU S10 M2AS 142.18(10) 2 1_556 ?
M4AG S10 M2AS 142.18(10) 2 1_556 ?
M8PB S10 M2AS 60.39(7) . 1_556 ?
M3PB S10 M2AS 129.41(9) . 1_556 ?
M5SB S10 M2AS 77.63(6) 4_576 1_556 ?
M2SB S10 M2AS 0.00(4) 1_556 1_556 ?
M10 S11 M9MN 91.75(16) . . ?
M10 S11 M5SB 97.92(12) . 1_556 ?
M9MN S11 M5SB 162.34(13) . 1_556 ?
M10 S11 M5SB 90.15(12) . 3_666 ?
M9MN S11 M5SB 89.60(11) . 3_666 ?
M5SB S11 M5SB 75.70(9) 1_556 3_666 ?
M10 S11 M8PB 100.37(11) . . ?
M9MN S11 M8PB 97.83(11) . . ?
M5SB S11 M8PB 94.93(12) 1_556 . ?
M5SB S11 M8PB 166.88(16) 3_666 . ?
M10 S11 M4AG 172.77(15) . 1_556 ?
M9MN S11 M4AG 90.27(9) . 1_556 ?
M5SB S11 M4AG 78.41(11) 1_556 1_556 ?
M5SB S11 M4AG 82.92(9) 3_666 1_556 ?
M8PB S11 M4AG 86.22(10) . 1_556 ?
M10 S11 M6SB 57.79(8) . 2_556 ?
M9MN S11 M6SB 139.14(12) . 2_556 ?
M5SB S11 M6SB 57.88(6) 1_556 2_556 ?
M5SB S11 M6SB 114.59(9) 3_666 2_556 ?
M8PB S11 M6SB 65.94(6) . 2_556 ?
M4AG S11 M6SB 123.53(13) 1_556 2_556 ?
M10 S11 M7AS 123.13(14) . 2_546 ?
M9MN S11 M7AS 51.71(6) . 2_546 ?
M5SB S11 M7AS 110.81(9) 1_556 2_546 ?
M5SB S11 M7AS 54.09(5) 3_666 2_546 ?
M8PB S11 M7AS 123.54(9) . 2_546 ?
M4AG S11 M7AS 53.76(5) 1_556 2_546 ?
M6SB S11 M7AS 167.38(9) 2_556 2_546 ?
M10 S11 M7SB 123.13(14) . 2_546 ?
M9MN S11 M7SB 51.71(6) . 2_546 ?
M5SB S11 M7SB 110.81(9) 1_556 2_546 ?
M5SB S11 M7SB 54.09(5) 3_666 2_546 ?
M8PB S11 M7SB 123.54(9) . 2_546 ?
M4AG S11 M7SB 53.76(5) 1_556 2_546 ?
M6SB S11 M7SB 167.38(9) 2_556 2_546 ?
M7AS S11 M7SB 0.00(3) 2_546 2_546 ?
M10 S11 M3PB 59.83(9) . . ?
M9MN S11 M3PB 62.01(8) . . ?
M5SB S11 M3PB 135.62(9) 1_556 . ?
M5SB S11 M3PB 135.54(13) 3_666 . ?
M8PB S11 M3PB 57.48(6) . . ?
M4AG S11 M3PB 127.01(9) 1_556 . ?
M6SB S11 M3PB 78.34(5) 2_556 . ?
M7AS S11 M3PB 113.45(8) 2_546 . ?
M7SB S11 M3PB 113.45(8) 2_546 . ?
M10 S12 M6SB 99.88(13) . 2_556 ?
M10 S12 M1MN 101.24(13) . 2 ?
M6SB S12 M1MN 107.54(12) 2_556 2 ?
M10 S12 M1SB 101.24(13) . 2 ?
M6SB S12 M1SB 107.54(12) 2_556 2 ?
M1MN S12 M1SB 0.00(6) 2 2 ?
M10 S12 M8PB 94.63(12) . . ?
M6SB S12 M8PB 92.81(12) 2_556 . ?
M1MN S12 M8PB 151.37(12) 2 . ?
M1SB S12 M8PB 151.37(12) 2 . ?
M10 S12 M3PB 91.15(10) . . ?
M6SB S12 M3PB 164.65(13) 2_556 . ?
M1MN S12 M3PB 80.41(10) 2 . ?
M1SB S12 M3PB 80.41(10) 2 . ?
M8PB S12 M3PB 75.56(6) . . ?
M10 S12 M2SB 67.39(7) . 4_676 ?
M6SB S12 M2SB 60.28(7) 2_556 4_676 ?
M1MN S12 M2SB 66.46(7) 2 4_676 ?
M1SB S12 M2SB 66.46(7) 2 4_676 ?
M8PB S12 M2SB 142.15(11) . 4_676 ?
M3PB S12 M2SB 134.66(10) . 4_676 ?
M10 S12 M2AS 67.39(7) . 4_676 ?
M6SB S12 M2AS 60.28(7) 2_556 4_676 ?
M1MN S12 M2AS 66.46(7) 2 4_676 ?
M1SB S12 M2AS 66.46(7) 2 4_676 ?
M8PB S12 M2AS 142.15(11) . 4_676 ?
M3PB S12 M2AS 134.66(10) . 4_676 ?
M2SB S12 M2AS 0.00(5) 4_676 4_676 ?
M10 S12 M4AG 141.96(13) . 2 ?
M6SB S12 M4AG 117.92(9) 2_556 2 ?
M1MN S12 M4AG 64.91(8) 2 2 ?
M1SB S12 M4AG 64.91(8) 2 2 ?
M8PB S12 M4AG 87.98(6) . 2 ?
M3PB S12 M4AG 52.78(5) . 2 ?
M2SB S12 M4AG 127.06(8) 4_676 2 ?
M2AS S12 M4AG 127.06(8) 4_676 2 ?
M10 S12 M9AG 150.52(14) . 2_556 ?
M6SB S12 M9AG 76.88(8) 2_556 2_556 ?
M1MN S12 M9AG 107.71(9) 2 2_556 ?
M1SB S12 M9AG 107.71(9) 2 2_556 ?
M8PB S12 M9AG 56.74(5) . 2_556 ?
M3PB S12 M9AG 88.26(6) . 2_556 ?
M2SB S12 M9AG 129.97(7) 4_676 2_556 ?
M2AS S12 M9AG 129.97(7) 4_676 2_556 ?
M4AG S12 M9AG 52.82(4) 2 2_556 ?
M10 S12 M9MN 150.52(14) . 2_556 ?
M6SB S12 M9MN 76.88(8) 2_556 2_556 ?
M1MN S12 M9MN 107.71(9) 2 2_556 ?
M1SB S12 M9MN 107.71(9) 2 2_556 ?
M8PB S12 M9MN 56.74(5) . 2_556 ?
M3PB S12 M9MN 88.26(6) . 2_556 ?
M2SB S12 M9MN 129.97(7) 4_676 2_556 ?
M2AS S12 M9MN 129.97(7) 4_676 2_556 ?
M4AG S12 M9MN 52.82(4) 2 2_556 ?
M9AG S12 M9MN 0.000(15) 2_556 2_556 ?
 
_diffrn_measured_fraction_theta_max    0.992
_diffrn_reflns_theta_full              32.32
_diffrn_measured_fraction_theta_full   0.992
_refine_diff_density_max    1.218
_refine_diff_density_min   -2.973
_refine_diff_density_rms    0.325
